# Supplementary material for: Measurement issues in longitudinal studies of mental health problems in children with neurodevelopmental disorders
Source: Springer Nature journal article supplement (doi:10.1186/s40359-025-02450-4), 2025-03-18
Supplement: MOESM1 [file 40359_2025_2450_MOESM1_ESM.pdf]

Supplementary Material: Measurement Issues in Longitudinal Studies of Mental Health Problems  
in Children With Neurodevelopmental Disabilities

Magnus Ivarsson, Henrik Danielsson, & Christine Imms

This document contains material supplementary to the article entitled “Measurement Issues in Longitudinal Studies of Mental Health Problems in Children With Neurodevelopmental Disabilities”, which was published in BMC Psychology.

**Table of Contents**

|                                                                                                                                                                                                                                                                                                                                                                                                                  |           |
|------------------------------------------------------------------------------------------------------------------------------------------------------------------------------------------------------------------------------------------------------------------------------------------------------------------------------------------------------------------------------------------------------------------|-----------|
| <b>Supplementary Table 1</b> Eligibility criteria for the screening process .....                                                                                                                                                                                                                                                                                                                                | <b>2</b>  |
| <b>Supplementary Table 2</b> Conceptual overlap between mental health problem outcomes and diagnostic criteria .....                                                                                                                                                                                                                                                                                             | <b>3</b>  |
| <b>Supplementary Table 3</b> Informants recruited in the included studies and an assessment of the appropriateness of the informant recruitment approach based on the age of the participants .....                                                                                                                                                                                                              | <b>13</b> |
| <b>Supplementary Table 4</b> Assessment of the feasibility of including the child’s perspective on the mental health problems outcomes in the included studies .....                                                                                                                                                                                                                                             | <b>19</b> |
| <b>Supplementary Table 5</b> Scales measuring mental health problems across studies and their suitability for use in the studied populations .....                                                                                                                                                                                                                                                               | <b>26</b> |
| <b>Supplementary Fig. 1</b> PRISMA flow diagram depicting how records were identified, screened, and assessed for eligibility at different phases .....                                                                                                                                                                                                                                                          | <b>31</b> |
| <b>Supplementary Fig. 2</b> Risk of bias for each of the four domains, i.e., overlap between mental health problem outcomes and characteristics of the study group (D1), insufficient informants (D2), unwarranted omission of the child perspective (D3), use of instruments not designed for or adapted to the study group (D4), as well as the overall risk of bias assessment for the included studies ..... | <b>32</b> |

## ISSUES

**Supplementary Table 1** Eligibility criteria for the screening process

| Aspects considered | Inclusion                                                                                                                                                                                                                                                                                                                                                                                                                                                                                                                                                                                                                                                                                                                                                  | Exclusion                                                                                                                                                                                                          |
|--------------------|------------------------------------------------------------------------------------------------------------------------------------------------------------------------------------------------------------------------------------------------------------------------------------------------------------------------------------------------------------------------------------------------------------------------------------------------------------------------------------------------------------------------------------------------------------------------------------------------------------------------------------------------------------------------------------------------------------------------------------------------------------|--------------------------------------------------------------------------------------------------------------------------------------------------------------------------------------------------------------------|
| Participants       | Studies reporting data separately for one or more groups of participants aged 18 years or below (for at least 2 of the time points), with one or more of the following disabilities: intellectual disability, autism spectrum disorder, attention deficit hyperactivity disorder, hearing impairment, seeing impairment, cerebral palsy, acquired brain injury, communication disorders, specific learning disorders, motor disorders [including developmental coordination disorder, tic, Tourette] or another diagnosed disability primarily associated with impairment(s) in the ICF-domains seeing and related functions (b210-b229), hearing functions (b230), mental functions (b1) and/or neuromusculoskeletal and movement-related functions (b7). | Studies reporting data from a study group with one or more participants older than 18 years of age and/or typical development and/or condition or disability other than the ones listed in the inclusion criteria. |
| Intervention(s)    | Intervention studies aiming at other outcomes than mental health and where it is reasonable to suggest that mental health will not be affected by intervention.                                                                                                                                                                                                                                                                                                                                                                                                                                                                                                                                                                                            | Any aiming at changing mental health                                                                                                                                                                               |
| Method             | Studies with longitudinal data series with at least 3 time points (where the mean time between the first and last time point is 2 years or longer) with the same measure of mental health problems across time points.                                                                                                                                                                                                                                                                                                                                                                                                                                                                                                                                     | Cross-sectional studies, longitudinal studies with less than 3 time points                                                                                                                                         |
| Main outcome(s)    | Mental health problems defined broadly (e.g., anxiety, behavior problems, depression, sleep problems) and conceptualized as a categorical or continuous variable                                                                                                                                                                                                                                                                                                                                                                                                                                                                                                                                                                                           | Any other                                                                                                                                                                                                          |
| Language           | English                                                                                                                                                                                                                                                                                                                                                                                                                                                                                                                                                                                                                                                                                                                                                    | Any other                                                                                                                                                                                                          |
| Publication year   | Any                                                                                                                                                                                                                                                                                                                                                                                                                                                                                                                                                                                                                                                                                                                                                        | NA                                                                                                                                                                                                                 |

**Supplementary Table 2** Conceptual overlap between mental health problem outcomes and diagnostic criteria

| Study         | Group                     | Scale                       | Overlap                             |                                  |                                                       |               |            | Risk of bias |
|---------------|---------------------------|-----------------------------|-------------------------------------|----------------------------------|-------------------------------------------------------|---------------|------------|--------------|
|               |                           |                             | Score                               | Item                             | Diagnostic criteria                                   | Code          | Addressed  |              |
| Anderson 2011 | Autism spectrum disorder  | Aberrant Behavior Checklist | Lethargy/Social withdrawal subscale | Fixed facial expression(s)       | "...a lack of facial expressions..."                  | ASD A3, DSM-5 | Can't tell | Unclear      |
|               |                           |                             | Hyperactivity subscale              | Pays no attention when spoken to | "...failure of normal back-and-forth conversation..." | ASD A1, DSM-5 | No         | High         |
|               |                           |                             | Irritability subscale               | Cries over minor things          | "...extreme distress at small changes..."             | ASD A3, DSM-5 | No         | High         |
| Auerbach 2008 | Dyscalculia               | Child Behavior Checklist    | Total                               | Poor school work                 | "Difficulties learning and using academic skills..."  | SLD A, DSM-5  | No         | High         |
|               |                           |                             | Attention problems subscale         | Poor school work                 | "Difficulties learning and using academic skills..."  | SLD A, DSM-5  | No         | High         |
|               | Nonpersistent dyscalculia | Child Behavior Checklist    | Total                               | Poor school work                 | "Difficulties learning and using academic skills..."  | SLD A, DSM-5  | No         | High         |

| Study         | Group                    | Scale                                    | Overlap                        |                                                 |                                                                                                      |                                   |           | Risk of bias |
|---------------|--------------------------|------------------------------------------|--------------------------------|-------------------------------------------------|------------------------------------------------------------------------------------------------------|-----------------------------------|-----------|--------------|
|               |                          |                                          | Score                          | Item                                            | Diagnostic criteria                                                                                  | Code                              | Addressed |              |
|               |                          |                                          | Attention problems subscale    | Poor school work                                | “Difficulties learning and using academic skills...”                                                 | SLD A, DSM-5                      | No        | High         |
| Ciciolla 2014 | Developmental delays     | Child Behavior Checklist                 | Internalising broad-band scale | Acts too young for age                          | “...fails to meet expected developmental milestones in several areas of intellectual functioning...” | Global Developmental Delay, DSM-5 | No        | High         |
|               |                          |                                          | Externalising broad-band scale | Can’t concentrate, can’t pay attention for long | “...fails to meet expected developmental milestones in several areas of intellectual functioning...” | Global Developmental Delay, DSM-5 | No        | High         |
| Colvert 2021  | Autism spectrum disorder | Strengths and Difficulties Questionnaire | Peer problems subscale         | Rather solitary, tends to play alone            | “...absence of interest in peers...”                                                                 | ASD A3, DSM-5                     | Yes       | Unclear      |
|               |                          |                                          | Pro-social behaviour subscale  | Considerate of other people’s feelings          | “...reduced sharing of interests, emotions, or affect...”                                            | ASD A1, DSM-5                     | Yes       | Unclear      |

| Study            | Group                                                              | Scale                                                | Overlap                        |                                                              |                                                                                                          |               |            | Risk of bias |
|------------------|--------------------------------------------------------------------|------------------------------------------------------|--------------------------------|--------------------------------------------------------------|----------------------------------------------------------------------------------------------------------|---------------|------------|--------------|
|                  |                                                                    |                                                      | Score                          | Item                                                         | Diagnostic criteria                                                                                      | Code          | Addressed  |              |
| Flouri 2015      | Aautism spectrum disorder                                          | Strengths and Difficulties Questionnaire             | Peer problems subscale         | Rather solitary, tends to play alone                         | “...absence of interest in peers...”                                                                     | ASD A3, DSM-5 | No         | High         |
|                  | Aautism spectrum disorder+Attention-deficit hyperactivity disorder | Strengths and Difficulties Questionnaire             | Peer problems subscale         | Rather solitary, tends to play alone                         | “...absence of interest in peers...”                                                                     | ASD A3, DSM-5 | No         | High         |
| Gotham 2015      | Developmental disabilities                                         | Child Behavior Checklist/Aberrant Behavior Checklist | Anxiety subscale               | Clings to adults or too dependent (Child Behavior Checklist) | “...failure to meet developmental and sociocultural standards for personal independence...”              | ID B, DSM-5   | Can’t tell | Unclear      |
|                  |                                                                    |                                                      | Affective/depressive subscales | Has trouble making decisions (Adult Behavior Checklist)      | “Deficits in intellectual functions, such as reasoning, problem solving, planning, abstract thinking...” | ID A, DSM-5   | Can’t tell | Unclear      |
| Green 2005       | Developmental disabilities                                         | Aberrant Behavior Checklist                          | Total                          | Abnormal repetitive movements                                | “Stereotype or repetitive motor movements...”                                                            | ASD B1, DSM-5 | No         | High         |
| Hauser-Cram 2016 | Developmental disabilities                                         | Child Behavior Checklist                             | Internalising broad-band scale | Acts too young for age                                       | “...failure to meet developmental                                                                        | ID A, DSM-5   | No         | High         |

| Study        | Group                                    | Scale                    | Overlap                        |                                                 |                                                                                         |                 |           | Risk of bias |
|--------------|------------------------------------------|--------------------------|--------------------------------|-------------------------------------------------|-----------------------------------------------------------------------------------------|-----------------|-----------|--------------|
|              |                                          |                          | Score                          | Item                                            | Diagnostic criteria                                                                     | Code            | Addressed |              |
|              |                                          |                          |                                |                                                 | [...] standards..."                                                                     |                 |           |              |
|              |                                          |                          | Externalising broad-band scale | Can't concentrate, can't pay attention for long | "Deficits in intellectual functions..."                                                 | ID A, DSM-5     | No        | High         |
| Hickey 2020  | Aautism spectrum disorder                | Teacher Report Form      | Total                          | Would rather be alone than with others          | "...absence of interest in peers."                                                      | ASD A3, DSM-5   | No        | High         |
| Horbach 2020 | Attention-deficit hyperactivity disorder | Child Behavior Checklist | Total                          | Breaks rules at home, school, or elsewhere      | "Often leaves seat in situations when remaining seated is expected"                     | ADHD A2b, DSM-5 | No        | High         |
|              |                                          |                          | Externalising broad-band scale | Breaks rules at home, school, or elsewhere      | "Often leaves seat in situations when remaining seated is expected"                     | ADHD A2b, DSM-5 | No        | High         |
|              |                                          |                          | Attention problems subscale    | Can't concentrate, can't pay attention for long | "Often has difficulty sustaining attention..."                                          | ADHD A1b, DSM-5 | No        | High         |
|              | Specific learning disorder               | Child Behavior Checklist | Total                          | Poor school work                                | "The affected academic skills [...] cause significant interference with academic [...]" | SLD B1, DSM-5   | No        | High         |

| Study     | Group                                                               | Scale                           | Overlap                       |                                                        |                                                                                                        |                 |           | Risk of bias |
|-----------|---------------------------------------------------------------------|---------------------------------|-------------------------------|--------------------------------------------------------|--------------------------------------------------------------------------------------------------------|-----------------|-----------|--------------|
|           |                                                                     |                                 | Score                         | Item                                                   | Diagnostic criteria                                                                                    | Code            | Addressed |              |
|           |                                                                     |                                 |                               |                                                        | performance..."                                                                                        |                 |           |              |
|           |                                                                     |                                 | Attention problems subscale   | Poor school work                                       | "The affected academic skills [...] cause significant interference with academic [...] performance..." | SLD B1, DSM-5   | No        | High         |
|           | Specific learning disorder+Attention-deficit hyperactivity disorder | Child Behavior Checklist        | Total                         | Breaks rules at home, school, or elsewhere             | "Often leaves seat in situations when remaining seated is expected"                                    | ADHD A2b, DSM-5 | No        | High         |
|           |                                                                     |                                 | Externalising broadband scale | Breaks rules at home, school, or elsewhere             | "Often leaves seat in situations when remaining seated is expected"                                    | ADHD A2b, DSM-5 | No        | High         |
|           |                                                                     |                                 | Attention problems subscale   | Can't concentrate, can't pay attention for long        | "Often has difficulty sustaining attention..."                                                         | ADHD A1b, DSM-5 | No        | High         |
| Hoza 2010 | Attention-deficit hyperactivity disorder                            | Children's Depression Inventory | Total                         | I have to push myself all the time to do my schoolwork | ...has difficulty remaining focused during lectures...                                                 | ADHD A1b, DSM-5 | No        | High         |

| Study         | Group                                    | Scale                                                              | Overlap                        |                                                                                          |                                                                                                                                             |                 |            | Risk of bias |
|---------------|------------------------------------------|--------------------------------------------------------------------|--------------------------------|------------------------------------------------------------------------------------------|---------------------------------------------------------------------------------------------------------------------------------------------|-----------------|------------|--------------|
|               |                                          |                                                                    | Score                          | Item                                                                                     | Diagnostic criteria                                                                                                                         | Code            | Addressed  |              |
| Midouhas 2013 | Aautism spectrum disorder                | Strengths and Difficulties Questionnaire                           | Total difficulties             | Rather solitary, tends to play alone                                                     | “...absence of interest in peers...”                                                                                                        | ASD A3, DSM-5   | No         | High         |
| Mrug 2012     | Attention-deficit hyperactivity disorder | Children’s Depression Inventory/Beck Depression Inventory          | Average item                   | I have to push myself all the time to do my schoolwork (Children’s Depression Inventory) | “...has difficulty remaining focused during lectures...”                                                                                    | ADHD A1b, DSM-5 | No         | High         |
|               |                                          | Multidimensional Anxiety Scale for Children/Beck Anxiety Inventory | Average item                   | I feel restless and on edge (Multidimensional Anxiety Scale for Children)                | “Often runs about or climbs in situations where it is inappropriate. (Note: In adolescents or adults, may be limited to feeling restless).” | ADHD A2c, DSM-5 | No         | High         |
| Peverill 2019 | Aautism spectrum disorder                | Child Behavior Checklist                                           | Internalising broad-band scale | Avoids looking others in the eye                                                         | “...abnormalities in eye contact...”                                                                                                        | ASD A2, DSM-5   | No         | High         |
|               |                                          | Repetitive Behavior Scale-Revised                                  | Total                          | Resists changing activities; difficulty with transitions                                 | “...difficulties with transitions...”                                                                                                       | ASD B2, DSM-5   | Can’t tell | Unclear      |



| Study            | Group                                    | Scale                       | Overlap                     |                                           |                                                                                                                               |                                                                 |           | Risk of bias |
|------------------|------------------------------------------|-----------------------------|-----------------------------|-------------------------------------------|-------------------------------------------------------------------------------------------------------------------------------|-----------------------------------------------------------------|-----------|--------------|
|                  |                                          |                             | Score                       | Item                                      | Diagnostic criteria                                                                                                           | Code                                                            | Addressed |              |
| Sigafoos 2000    | Developmental disabilities               | Aberrant Behavior Checklist | Total                       | Abnormal repetitive movements             | “Stereotype or repetitive motor movements...”                                                                                 | ASD B1, DSM-5                                                   | No        | High         |
| Sipal 2010       | Cerebral palsy                           | Child Behavior Checklist    | Total                       | Poorly coordinated or clumsy              | “Abnormal gross and fine motor functioning and organization (reflecting abnormal motor control) are the core features of CF.” | Cerebral Palsy Clarification 6, Rosenbaum et al. (2007, p. 10)  | Yes       | Low          |
|                  |                                          |                             | Social problems subscale    | Speech problem                            | “...motor problems can lead to difficulties with [...] articulation of speech...”                                             | Cerebral Palsy Clarification 6, Rosenbaum et al. (2007, p. 10)  | Yes       | Low          |
|                  |                                          |                             | Attention problems subscale | Stares blankly                            | “Vision, hearing and other sensory modalities may be affected...”                                                             | Cerebral Palsy Clarification 15, Rosenbaum et al. (2007, p. 10) | Yes       | Low          |
| Steinhausen 2003 | Attention-deficit hyperactivity disorder | Child Behavior Checklist    | Total                       | Can’t sit still, restless, or hyperactive | “A persistent pattern of [...] hyperactivity-                                                                                 | ADHD A, DSM-5                                                   | Yes       | Unclear      |

| Study             | Group                    | Scale                              | Overlap                        |                                            |                                                                                                            |                             |            | Risk of bias |
|-------------------|--------------------------|------------------------------------|--------------------------------|--------------------------------------------|------------------------------------------------------------------------------------------------------------|-----------------------------|------------|--------------|
|                   |                          |                                    | Score                          | Item                                       | Diagnostic criteria                                                                                        | Code                        | Addressed  |              |
|                   |                          |                                    |                                |                                            | impulsivity”                                                                                               |                             |            |              |
|                   |                          |                                    | Externalising broad-band scale | Talks too much                             | “Often talks excessively”                                                                                  | ADHD A2f, DSM-5             | Yes        | Unclear      |
|                   |                          |                                    | Attention problems subscale    | Can’t sit still, restless, or hyperactive  | “A persistent pattern of [...] hyperactivity-impulsivity”                                                  | ADHD A, DSM-5               | Yes        | Unclear      |
| Vaillancourt 2017 | Autism spectrum disorder | Child Behavior Checklist           | Aggressive behaviour subscale  | Talks too much                             | “Often talks excessively”                                                                                  | ADHD A2f, DSM-5             | Yes        | Unclear      |
|                   |                          |                                    | Internalising broad-band scale | Doesn’t answer when people talk to him/her | “...failure of normal back-and-forth conversation...”                                                      | ASD A1, DSM-5               | Can’t tell | Unclear      |
| Vaughn 1993       | Learning disabilities    | Revised Behavior Problem Checklist | Attention problems subscale    | School work is messy, sloppy               | “Difficulties learning and using academic skills...”                                                       | SLD A, DSM-5                | No         | High         |
|                   |                          |                                    | Anxious-withdrawn subscale     | Feels he or she can’t succeed              | “Even with an array of appropriate accommodations or services at home, at school, or in the workplace, the | SLD Severe specifier, DSM-5 | No         | High         |

| Study       | Group                                                           | Scale                              | Overlap                     |                               |                                                                                                                                                                                  |                             |           | Risk of bias |
|-------------|-----------------------------------------------------------------|------------------------------------|-----------------------------|-------------------------------|----------------------------------------------------------------------------------------------------------------------------------------------------------------------------------|-----------------------------|-----------|--------------|
|             |                                                                 |                                    | Score                       | Item                          | Diagnostic criteria                                                                                                                                                              | Code                        | Addressed |              |
|             |                                                                 |                                    |                             |                               | individual may not be able to complete all activities efficiently..."                                                                                                            |                             |           |              |
| Vaughn 1994 | Learning disabilities                                           | Revised Behavior Problem Checklist | Attention problems subscale | School work is messy, sloppy  | "Difficulties learning and using academic skills..."                                                                                                                             | SLD A, DSM-5                | No        | High         |
|             |                                                                 |                                    | Anxious-withdrawn subscale  | Feels he or she can't succeed | "Even with an array of appropriate accommodations or services at home, at school, or in the workplace, the individual may not be able to complete all activities efficiently..." | SLD Severe specifier, DSM-5 | No        | High         |
| Wei 2014    | Attention-deficit hyperactivity disorder+Emotional disturbances | Social Skills Rating Systems       | Problem behaviour subscale  | Is easily distracted          | "Is often easily distracted by extraneous stimuli"                                                                                                                               | ADHD A1h, DSM-5             | No        | High         |
|             | Learning disabilities                                           | Social Skills                      | Problem behaviour           | Is easily distracted          | "Is often easily distracted by                                                                                                                                                   | ADHD A1h,                   | No        | High         |

| Study        | Group                                     | Scale                    | Overlap                        |                                                 |                                                       |             |           | Risk of bias |
|--------------|-------------------------------------------|--------------------------|--------------------------------|-------------------------------------------------|-------------------------------------------------------|-------------|-----------|--------------|
|              |                                           |                          | Score                          | Item                                            | Diagnostic criteria                                   | Code        | Addressed |              |
|              | +Attention-deficit hyperactivity disorder | Rating Systems           | subscale                       |                                                 | extraneous stimuli”                                   | DSM-5       |           |              |
| Woodman 2015 | Developmental disabilities                | Child Behavior Checklist | Internalising broad-band scale | Acts too young for age                          | “...failure to meet developmental [...] standards...” | ID A, DSM-5 | No        | High         |
|              |                                           |                          | Externalising broad-band scale | Can’t concentrate, can’t pay attention for long | “Deficits in intellectual functions...”               | ID A, DSM-5 | No        | High         |

*Note.* Risk of bias in the first domain and one example of an overlap between an item in a scale measuring mental health problems and one of the diagnostic criteria used to define the population. Studies with no clear conceptual overlap are excluded from the table. One of the included studies [57] could not be assessed for overlap due to an inability to retrieve the scale applied in the study. For another study [58], the assessment was based on the instrument used at the last data collection wave (ABC) as the investigator was not able to access the scales applied in earlier waves. Because the different scales were treated as equivalent in the analyses, relying on the ABC in the assessment of overlap was deemed acceptable. Abbreviations used in the table: attention-deficit hyperactivity disorder (ADHD), autism spectrum disorder (ASD), Diagnostic and Statistical Manual of Mental Disorders (DSM), intellectual disability (ID), specific learning disorder (SLD).

**Supplementary Table 3** Informants recruited in the included studies and an assessment of the appropriateness of the informant recruitment approach based on the age of the participants

| Study                  | Scale                                                                     | Mental health concept                              | Informants    | Age <6 years | Risk of bias |
|------------------------|---------------------------------------------------------------------------|----------------------------------------------------|---------------|--------------|--------------|
| Alsem 2013             | TNO-AZL Preschool Children Quality of Life Parent Form                    | Behaviour problems, sleeping problems, and anxiety | Parent        | Yes          | Low          |
| Anderson 2011          | Aberrant Behavior Checklist                                               | Maladaptive behaviours                             | Parent        | No           | High         |
| Auerbach 2008          | Child Behavior Checklist                                                  | Behaviour problems                                 | Parent        | No           | High         |
| Baribeau 2021          | Child Behavior Checklist                                                  | Anxiety                                            | Parent        | No           | High         |
| Biederman 1996         | Kiddie Schedule for Affective Disorders and Schizophrenia—Epidemiological | Psychiatric disorders                              | Parent, child | No           | Low          |
| Ciciolla 2014          | Child Behavior Checklist                                                  | Internalising and externalising symptoms           | Parent        | Yes          | Low          |
| Colvert 2021           | Strengths and Difficulties Questionnaire                                  | Emotional and behavioural difficulties             | Parent        | No           | High         |
| Cornish 2012           | Conners Teacher Rating Scales—Revised                                     | Oppositional behaviour problems                    | Teacher       | No           | High         |
| Fielding-Gebhardt 2020 | Child Behavior Checklist                                                  | Challenging behaviours                             | Parent        | No           | High         |
| Flouri 2015            | Strengths and Difficulties Questionnaire                                  | Emotional and conduct problems                     | Parent        | No           | High         |
| Gotham 2015            | Child Behavior Checklist/Adult Behavior Checklist                         | Anxiety                                            | Parent        | No           | High         |

| Study            | Scale                                                                                                                                                                       | Mental health concept                          | Informants      | Age <6 years | Risk of bias |
|------------------|-----------------------------------------------------------------------------------------------------------------------------------------------------------------------------|------------------------------------------------|-----------------|--------------|--------------|
|                  |                                                                                                                                                                             | Depressive symptoms                            | Parent          | No           | High         |
| Green 2005       | Aberrant Behavior Checklist                                                                                                                                                 | Aberrant behaviour                             | Teacher         | No           | High         |
| Harvey 2015      | Disruptive Behavior Rating Scale                                                                                                                                            | Oppositional defiant disorder symptoms         | Parent          | No           | High         |
| Hauser-Cram 2016 | Child Behavior Checklist                                                                                                                                                    | Behaviour problems                             | Parent          | No           | High         |
| Hickey 2020      | Teacher Report Form                                                                                                                                                         | Emotional and behavioural problems             | Teacher         | No           | High         |
| Hogan 2014       | Strengths and Difficulties Questionnaire                                                                                                                                    | Psychosocial outcomes                          | Parent, teacher | No           | Low          |
| Holmbeck 2010    | Children's Depression Inventory                                                                                                                                             | Internalising symptoms                         | Child           | No           | High         |
| Horbach 2020     | Child Behavior Checklist                                                                                                                                                    | Emotional and behavioural problems             | Parent          | No           | High         |
| Hoza 2010        | Children's Depression Inventory                                                                                                                                             | Depressive symptoms                            | Child           | No           | High         |
|                  | DSM-IV Conduct Disorder Checklist                                                                                                                                           | Aggressive behaviour                           | Parent          | No           | High         |
| Hunsche 2020     | Child Behavior Checklist                                                                                                                                                    | Suicidal ideation and self-injurious behaviour | Parent          | No           | High         |
| Kates 2019       | Kiddie Schedule for Affective Disorders and Schizophrenia for School-Age Children—Present and Lifetime Version/Structured Clinical Interview for DSM-IV-TR axis I Disorders | Psychiatric diagnoses                          | Parent, child   | No           | Low          |

| Study          | Scale                                                                                                | Mental health concept                           | Informants      | Age <6 years | Risk of bias |
|----------------|------------------------------------------------------------------------------------------------------|-------------------------------------------------|-----------------|--------------|--------------|
| Lahey 2016     | Diagnostic Interview Schedule for Children                                                           | Depression symptoms                             | Parent, child   | No           | Low          |
|                |                                                                                                      | Anxiety symptoms                                | Parent, child   | No           | Low          |
|                | Diagnostic Interview Schedule for Children/Disruptive Behavior Disorders Rating Scale—DSM-IV Version | Conduct disorder symptoms                       | Parent, teacher | No           | Low          |
|                | Diagnostic Interview Schedule for Children                                                           | Conduct disorder symptoms                       | Child           | No           | Low          |
|                | Diagnostic Interview Schedule for Children/Disruptive Behavior Disorders Rating Scale—DSM-IV Version | Oppositional defiant disorder symptoms          | Parent, teacher | No           | Low          |
| Li 2020        | Early Childhood Inventory—4                                                                          | Internalising and externalising problems        | Parent          | No           | High         |
|                | Emotion Expression Questionnaire                                                                     | Negative emotion expression                     | Parent          | No           | High         |
| Lindsay 2007   | Strengths and Difficulties Questionnaire                                                             | Behavioural, emotional, and social difficulties | Parent, teacher | No           | Low          |
| Midouhas 2013  | Strengths and Difficulties Questionnaire                                                             | Psychopathology                                 | Parent          | No           | High         |
| Moskowitz 2020 | Repetitive Behavior Scale—Revised                                                                    | Self injurious and compulsive behaviour         | Parent          | No           | High         |
| Mrug 2012      | Children’s Depression Inventory/Beck Depression Inventory                                            | Depression                                      | Child           | No           | High         |

| Study             | Scale                                                                                                          | Mental health concept                           | Informants | Age <6 years | Risk of bias |
|-------------------|----------------------------------------------------------------------------------------------------------------|-------------------------------------------------|------------|--------------|--------------|
|                   | Multidimensional Anxiety Scale for Children/Beck Anxiety Inventory                                             | Anxiety                                         | Child      | No           | High         |
| Murray-Close 2010 | DSM-IV Conduct Disorder Checklist                                                                              | Aggressive and antisocial behaviour             | Parent     | No           | High         |
| Musser 2016       | Kiddie Schedule for Affective Disorders and Schizophrenia—Epidemiological Oppositional Defiant Disorder module | Oppositional defiant disorder symptoms          | Parent     | No           | Low          |
|                   | DSM-based checklist                                                                                            | Oppositional defiant disorder symptoms          | Teacher    | No           | Low          |
| Peverill 2019     | Child Behavior Checklist                                                                                       | Externalising and internalising behaviour       | Parent     | No           | High         |
|                   | Repetitive Behavior Scale—Revised                                                                              | Restricted and repetitive behaviours            | Parent     | No           | High         |
|                   | Children’s Sleep Habits Questionnaire                                                                          | Sleep problems                                  | Parent     | No           | High         |
| Rai 2018          | Short Mood and Feelings Questionnaire                                                                          | Depressive symptoms                             | Child      | No           | High         |
| Rosema 2015       | Personality Inventory for Children—Revised/Behavior Assessment Scale for Children/Adult Behavior Checklist     | Internalising and externalising symptoms        | Parent     | No           | High         |
| Sigafoos 2000     | Aberrant Behavior Checklist                                                                                    | Aberrant behaviour                              | Teacher    | No           | High         |
| Sipal 2010        | Child Behavior Checklist                                                                                       | Behaviour problems                              | Parent     | No           | High         |
| St Clair 2011     | Strengths and Difficulties Questionnaire                                                                       | Behavioural, emotional, and social difficulties | Teacher    | No           | High         |



| Study             | Scale                                                                                                          | Mental health concept                                            | Informants | Age <6 years | Risk of bias |
|-------------------|----------------------------------------------------------------------------------------------------------------|------------------------------------------------------------------|------------|--------------|--------------|
| Steinhausen 2003  | Child Behavior Checklist                                                                                       | Behavioural change                                               | Parent     | No           | High         |
| Stringer 2020     | Strengths and Difficulties Questionnaire                                                                       | Mental health symptoms                                           | Parent     | No           | High         |
| Tan 2014          | TNO-AZL Preschool Children Quality of Life Parent Form                                                         | Psychological functioning                                        | Parent     | Yes          | Low          |
|                   | TNO-AZL Children's Quality of Life Parent Form                                                                 | Psychological functioning                                        | Parent     | No           | High         |
|                   | TNO-AZL Children's Quality of Life Child Form                                                                  | Psychological functioning                                        | Child      | No           | High         |
| Vaillancourt 2017 | Child Behavior Checklist                                                                                       | Mental health problems                                           | Parent     | No           | High         |
| Van keer 2021     | Scale for Emotional Development-Revised                                                                        | Social-emotional development                                     | Parent     | Yes          | Low          |
| Vaughn 1993       | Revised Behavior Problem Checklist                                                                             | Behaviour problems                                               | Teacher    | No           | High         |
| Vaughn 1994       | Revised Behavior Problem Checklist                                                                             | Behaviour problems                                               | Teacher    | No           | High         |
| Wall 2019         | Infant Behavior Questionnaire—Revised/Early Childhood Behavior Questionnaire/Children's Behavior Questionnaire | Negative affect                                                  | Parent     | Yes          | Low          |
| Wei 2014          | Social Skills Rating Systems                                                                                   | Internalising problems, externalising problems and hyperactivity | Teacher    | No           | High         |

| Study                | Scale                                                             | Mental health concept                 | Informants     | Age <6 years | Risk of bias |
|----------------------|-------------------------------------------------------------------|---------------------------------------|----------------|--------------|--------------|
|                      | School records                                                    | School behaviour problems             | School records | No           | High         |
| Williams 2016        | Australian Temperament Scale—Short Form, Infant and Child Version | Emotional dysregulation               | Parent         | No           | High         |
|                      | Single item                                                       | Sleep problems                        | Parent         | No           | High         |
| Woodman 2015         | Child Behavior Checklist                                          | Behaviour problems                    | Parent         | No           | High         |
| Woodruff-Borden 2010 | Anxiety Disorders Interview Schedule for DSM-IV: Parent Version   | Anxiety disorders                     | Parent         | No           | High         |
| Yeates 2006          | Teacher Report Form                                               | Emotional and behavioural functioning | Teacher        | No           | High         |
| Zendarski 2021       | Strengths and Difficulties Questionnaire                          | Emotional and conduct problems        | Parent         | No           | High         |

*Note.* Risk of bias in the second domain (i.e., lack of a multi-informant approach) and the factors used as the basis for the decision: number of informants reporting on the mental health problem outcomes and if the mean age of the participating children was below six for all data points. Abbreviations used in the table: Diagnostic and Statistical Manual of Mental Disorders (DSM), Netherlands Organization for Applied Scientific Research/Academic Hospital Leiden Center (TNO-AZL).

**Supplementary Table 4** Assessment of the feasibility of including the child's perspective on the mental health problems outcomes in the included studies

| Study          | Groups                                   | Scales                                                                    | Child rating | Was child rating feasible? |                                                                   | Risk of bias |
|----------------|------------------------------------------|---------------------------------------------------------------------------|--------------|----------------------------|-------------------------------------------------------------------|--------------|
|                |                                          |                                                                           |              | Feasible                   | Factors influencing assessment                                    |              |
| Alsem 2013     | Cerebral palsy                           | TNO-AZL Preschool Children Quality of Life Parent Form                    | No           | No                         | No data on IQ or ID-status, <9 yo on all waves                    | Low          |
| Anderson 2011  | Autism spectrum disorder                 | Aberrant Behavior Checklist                                               | No           | No                         | Nonverbal IQ M = 53, >11 yo on a majority of waves                | Low          |
| Auerbach 2008  | Dyscalculia, Nonpersistent dyscalculia   | Child Behavior Checklist                                                  | No           | Yes                        | IQ M = 99.1/99.4, >9 yo on all waves                              | High         |
| Baribeau 2021  | Autism spectrum disorder                 | Child Behavior Checklist                                                  | No           | No                         | IQ M = 58.0, <9 yo on a majority of waves                         | Low          |
| Biederman 1996 | Attention-deficit hyperactivity disorder | Kiddie Schedule for Affective Disorders and Schizophrenia—Epidemiological | Yes          | Yes                        | Included some degree of child self-assessment                     | Low          |
| Ciciolla 2014  | Developmental delays                     | Child Behavior Checklist                                                  | No           | No                         | Child developmental status M = 60.0, <9 yo on a majority of waves | Low          |
| Colvert 2021   | Autism spectrum disorder                 | Strengths and Difficulties Questionnaire                                  | No           | No                         | IQ M = 92, <9 yo on a majority of waves                           | Low          |
| Cornish 2012   | Fragile X                                | Conners Teacher Rating Scales—Revised                                     | No           | No                         | IQ M = 52.0-65.5, <11 yo on all waves.                            | Low          |

| Study                  | Groups                                                                                      | Scales                                            | Child rating | Was child rating feasible? |                                                                  | Risk of bias |
|------------------------|---------------------------------------------------------------------------------------------|---------------------------------------------------|--------------|----------------------------|------------------------------------------------------------------|--------------|
|                        |                                                                                             |                                                   |              | Feasible                   | Factors influencing assessment                                   |              |
| Fielding-Gebhardt 2020 | Fragile X                                                                                   | Child Behavior Checklist                          | No           | Can't tell                 | No data on IQ or ID-status, >9 yo on all waves                   | Unclear      |
| Flouri 2015            | Autism spectrum disorder, Autism spectrum disorder+Attention-deficit hyperactivity disorder | Strengths and Difficulties Questionnaire          | No           | No                         | No data on IQ or ID-status, <9 yo on a majority of waves         | Low          |
| Gotham 2015            | Developmental disabilities                                                                  | Child Behavior Checklist/Adult Behavior Checklist | No           | Yes                        | Verbal IQ M = 79.6, >11 yo on all waves                          | High         |
| Green 2005             | Developmental disabilities                                                                  | Aberrant Behavior Checklist                       | No           | No                         | No data on IQ or ID-status, <9 yo on a majority of waves         | Low          |
| Harvey 2015            | Attention-deficit hyperactivity disorder                                                    | Disruptive Behavior Rating Scale                  | No           | No                         | No data on IQ or ID-status, <9 yo on a majority of waves         | Low          |
| Hauser-Cram 2016       | Developmental disabilities                                                                  | Child Behavior Checklist                          | No           | Can't tell                 | ID in 57% but level not specified, <11 yo on a majority of waves | Low          |
| Hickey 2020            | Autism spectrum disorder                                                                    | Teacher Report Form                               | No           | Yes                        | ID in 35.2%, >9 yo on all waves                                  | High         |
| Hogan 2014             | Hearing problems                                                                            | Strengths and Difficulties Questionnaire          | No           | No                         | No data on IQ or ID-status, <9 yo on a majority of waves         | Low          |

| Study         | Groups                                                               | Scales                                                                                                                                                                      | Child rating | Was child rating feasible? |                                               | Risk of bias |
|---------------|----------------------------------------------------------------------|-----------------------------------------------------------------------------------------------------------------------------------------------------------------------------|--------------|----------------------------|-----------------------------------------------|--------------|
|               |                                                                      |                                                                                                                                                                             |              | Feasible                   | Factors influencing assessment                |              |
| Holmbeck 2010 | Spina bifida                                                         | Children's Depression Inventory                                                                                                                                             | Yes          | Yes                        | Included some degree of child self-assessment | Low          |
| Horbach 2020  | Specific learning disorder, Attention-deficit hyperactivity disorder | Child Behavior Checklist                                                                                                                                                    | No           | No                         | IQ M = 101.55, <9 yo on a majority of waves   | Low          |
| Hoza 2010     | Attention-deficit hyperactivity disorder                             | Children's Depression Inventory, DSM-IV Conduct Disorder Checklist                                                                                                          | Yes          | Yes                        | Included some degree of child self-assessment | Low          |
| Hunsche 2020  | Autism spectrum disorder                                             | Child Behavior Checklist                                                                                                                                                    | No           | Yes                        | IQ M >70, >9 yo on a majority of waves        | High         |
| Kates 2019    | 22q11.2 deletion syndrome                                            | Kiddie Schedule for Affective Disorders and Schizophrenia for School-Age Children—Present and Lifetime Version/Structured Clinical Interview for DSM-IV-TR axis I Disorders | Yes          | Yes                        | Included some degree of child self-assessment | Low          |
| Lahey 2016    | Attention-deficit hyperactivity disorder                             | Diagnostic Interview Schedule for Children, Disruptive Behavior Disorders Rating Scale—DSM-IV Version                                                                       | Yes          | Yes                        | Included some degree of child self-assessment | Low          |
| Li 2020       | Autism spectrum disorder                                             | Early Childhood Inventory—4, Emotion Expression Questionnaire                                                                                                               | No           | No                         | IQ M = 100.50, <9 yo on a majority of waves   | Low          |

| Study             | Groups                                   | Scales                                                                                                                              | Child rating | Was child rating feasible? |                                                                              | Risk of bias |
|-------------------|------------------------------------------|-------------------------------------------------------------------------------------------------------------------------------------|--------------|----------------------------|------------------------------------------------------------------------------|--------------|
|                   |                                          |                                                                                                                                     |              | Feasible                   | Factors influencing assessment                                               |              |
| Lindsay 2007      | Specific speech and language difficulty  | Strengths and Difficulties Questionnaire                                                                                            | No           | Yes                        | Non-verbal ability “in the normal range”, >9 yo on a majority of waves       | High         |
| Midouhas 2013     | Autism spectrum disorder                 | Strengths and Difficulties Questionnaire                                                                                            | No           | No                         | No data on IQ or ID-status, <9 yo on a majority of waves                     | Low          |
| Moskowitz 2020    | Fragile X                                | Repetitive Behavior Scale—Revised                                                                                                   | No           | No                         | IQ M = 56.70, <9 yo on a majority of waves                                   | Low          |
| Mrug 2012         | Attention-deficit hyperactivity disorder | Children’s Depression Inventory/Beck Depression Inventory, Multidimensional Anxiety Scale for Children/Beck Anxiety Inventory       | Yes          | Yes                        | Included some degree of child self-assessment                                | Low          |
| Murray-Close 2010 | Attention-deficit hyperactivity disorder | DSM-IV Conduct Disorder Checklist                                                                                                   | No           | Yes                        | IQ M = 100.9 (entire MTA group), >9 yo on all waves                          | High         |
| Musser 2016       | Attention-deficit hyperactivity disorder | Kiddie Schedule for Affective Disorders and Schizophrenia—Epidemiological Oppositional Defiant Disorder module, DSM-based checklist | No           | Yes                        | IQ >74, >9 yo on all waves                                                   | High         |
| Peverill 2019     | Autism spectrum disorder                 | Child Behavior Checklist, Repetitive Behavior Scale—Revised, Children’s Sleep Habits Questionnaire                                  | No           | No                         | Developmental functioning (IQ proxy) M = 57.35, <9 yo on a majority of waves | Low          |
| Rai 2018          | Autism spectrum                          | Short Mood and Feelings                                                                                                             | Yes          | Yes                        | Included some degree of child self-                                          | Low          |

| Study             | Groups                                   | Scales                                                                                                                                                | Child rating | Was child rating feasible? |                                                                    | Risk of bias |
|-------------------|------------------------------------------|-------------------------------------------------------------------------------------------------------------------------------------------------------|--------------|----------------------------|--------------------------------------------------------------------|--------------|
|                   |                                          |                                                                                                                                                       |              | Feasible                   | Factors influencing assessment                                     |              |
|                   | disorder                                 | Questionnaire                                                                                                                                         |              |                            | assessment                                                         |              |
| Rosema 2015       | Traumatic brain injury                   | Personality Inventory for Children—Revised                                                                                                            | No           | Can't tell                 | No data on IQ or ID-status, >9 yo on a majority of waves           | Unclear      |
| Sigafoos 2000     | Developmental disabilities               | Aberrant Behavior Checklist                                                                                                                           | No           | No                         | No data on IQ or ID-status, <9 yo on a majority of waves           | Low          |
| Sipal 2010        | Cerebral palsy                           | Child Behavior Checklist                                                                                                                              | No           | Can't tell                 | No data on IQ or ID-status, >9 yo on all waves                     | Unclear      |
| St Clair 2011     | Specific language impairment             | Strengths and Difficulties Questionnaire                                                                                                              | No           | Yes                        | Performance IQ M = 105.98, >9 yo on 50% of waves                   | High         |
| Steinhausen 2003  | Attention-deficit hyperactivity disorder | Child Behavior Checklist                                                                                                                              | No           | Yes                        | IQ M = 98.8, >9 yo for 50% of waves                                | High         |
| Stringer 2020     | Autism spectrum disorder                 | Strengths and Difficulties Questionnaire                                                                                                              | No           | Yes                        | IQ M = 72.2, >11 yo on all waves                                   | High         |
| Tan 2014          | Cerebral palsy                           | TNO-AZL Preschool Children Quality of Life Parent Form, TNO-AZL Children's Quality of Life Parent Form, TNO-AZL Children's Quality of Life Child Form | Yes          | Yes                        | Included some degree of child self-assessment                      | Low          |
| Vaillancourt 2017 | Autism spectrum disorder                 | Child Behavior Checklist                                                                                                                              | No           | No                         | Developmental level (IQ proxy) M = 56.75-61.48, <9 yo on all waves | Low          |

| Study         | Groups                                                                                                                                                 | Scales                                                                                                         | Child rating | Was child rating feasible? |                                                                                                                         | Risk of bias |
|---------------|--------------------------------------------------------------------------------------------------------------------------------------------------------|----------------------------------------------------------------------------------------------------------------|--------------|----------------------------|-------------------------------------------------------------------------------------------------------------------------|--------------|
|               |                                                                                                                                                        |                                                                                                                |              | Feasible                   | Factors influencing assessment                                                                                          |              |
| Van keer 2021 | Significant cognitive and motor developmental delay                                                                                                    | Scale for Emotional Development-Revised                                                                        | No           | No                         | “Significant cognitive delay”, <9 yo on all waves                                                                       | Low          |
| Vaughn 1993   | Learning disabilities                                                                                                                                  | Revised Behavior Problem Checklist                                                                             | No           | No                         | IQ M = 92, <9 yo on a majority of waves                                                                                 | Low          |
| Vaughn 1994   | Learning disabilities                                                                                                                                  | Revised Behavior Problem Checklist                                                                             | No           | No                         | IQ M = 92, <9 yo on a majority of waves                                                                                 | Low          |
| Wall 2019     | Fragile X                                                                                                                                              | Infant Behavior Questionnaire—Revised/Early Childhood Behavior Questionnaire/Children’s Behavior Questionnaire | No           | No                         | Developmental level (IQ proxy) M = 58.21-68.17, <9 yo on a majority of waves                                            | Low          |
| Wei 2014      | Learning disabilities, Learning disabilities+Attention-deficit hyperactivity disorder, Attention-deficit hyperactivity disorder+Emotional disturbances | Social Skills Rating Systems, School records                                                                   | No           | Yes                        | Included children classified as having a learning disability or emotional disturbances (but not ID), >9 yo on all waves | High         |
| Williams 2016 | Attention-deficit hyperactivity disorder, Attention-deficit hyperactivity disorder symptomatic                                                         | Australian Temperament Scale—Short Form, Infant and Child Version, Single item                                 | No           | No                         | No data on IQ or ID-status, <9 yo on a majority of waves                                                                | Low          |
| Woodman 2015  | Developmental                                                                                                                                          | Child Behavior Checklist                                                                                       | No           | Can’t tell                 | No data on IQ or level of ID, >9 yo on a                                                                                | Unclear      |



| Study                | Groups                                                         | Scales                                                          | Child rating | Was child rating feasible? |                                                                                            | Risk of bias |
|----------------------|----------------------------------------------------------------|-----------------------------------------------------------------|--------------|----------------------------|--------------------------------------------------------------------------------------------|--------------|
|                      |                                                                |                                                                 |              | Feasible                   | Factors influencing assessment                                                             |              |
|                      | disabilities                                                   |                                                                 |              |                            | majority of waves                                                                          |              |
| Woodruff-Borden 2010 | Williams syndrome                                              | Anxiety Disorders Interview Schedule for DSM-IV: Parent Version | No           | Can't tell                 | No data on IQ, not possible to determine if the sample was >9 yo for at least 50% of waves | Unclear      |
| Yeates 2006          | Traumatic brain injury severe, Traumatic brain injury moderate | Teacher Report Form                                             | No           | Can't tell                 | No data on IQ post-injury, >9 yo on all waves                                              | Unclear      |
| Zendarski 2021       | Attention-deficit hyperactivity disorder                       | Strengths and Difficulties Questionnaire                        | No           | Yes                        | IQ $\geq$ 70, >9 yo on all waves                                                           | High         |

*Note.* Risk of bias in the third domain (i.e., unwarranted omission of the child's perspective) and the factors used as the basis for the decision: if any of the longitudinal mental health problem outcomes were child rated and if child rating would have been feasible given the age and intellectual functioning of the participants. Abbreviations used in the table: Diagnostic and Statistical Manual of Mental Disorders (DSM), intellectual disability (ID), intelligence quotient (IQ), Netherlands Organization for Applied Scientific Research/Academic Hospital Leiden Center (TNO-AZL), years old (yo).

**Supplementary Table 5** Scales measuring mental health problems across studies and their suitability for use in the studied populations

| Study                  | Scale                                                                     | Intended population | Designed for | Adapted | Risk of bias |
|------------------------|---------------------------------------------------------------------------|---------------------|--------------|---------|--------------|
| Alsem 2013             | TNO-AZL Preschool Children Quality of Life Parent Form                    | No                  | TD           | No      | High         |
| Anderson 2011          | Aberrant Behavior Checklist                                               | Yes                 | DD           | No      | Low          |
| Auerbach 2008          | Child Behavior Checklist                                                  | No                  | TD           | No      | High         |
| Baribeau 2021          | Child Behavior Checklist                                                  | No                  | TD           | No      | High         |
| Biederman 1996         | Kiddie Schedule for Affective Disorders and Schizophrenia—Epidemiological | No                  | TD           | No      | High         |
| Ciciolla 2014          | Child Behavior Checklist                                                  | No                  | TD           | No      | High         |
| Colvert 2021           | Strengths and Difficulties Questionnaire                                  | No                  | TD           | No      | High         |
| Cornish 2012           | Conners Teacher Rating Scales—Revised                                     | No                  | TD           | No      | High         |
| Fielding-Gebhardt 2020 | Child Behavior Checklist                                                  | No                  | TD           | No      | High         |
| Flouri 2015            | Strengths and Difficulties Questionnaire                                  | No                  | TD           | No      | High         |
| Gotham 2015            | Child Behavior Checklist/Adult Behavior Checklist                         | No                  | TD           | No      | High         |
| Green 2005             | Aberrant Behavior Checklist                                               | Yes                 | DD           | No      | Low          |
| Harvey 2015            | Disruptive Behavior Rating Scale                                          | No                  | TD           | No      | High         |

| Study            | Scale                                                                                                                                                                       | Intended population | Designed for | Adapted | Risk of bias |
|------------------|-----------------------------------------------------------------------------------------------------------------------------------------------------------------------------|---------------------|--------------|---------|--------------|
| Hauser-Cram 2016 | Child Behavior Checklist                                                                                                                                                    | No                  | TD           | No      | High         |
| Hickey 2020      | Teacher Report Form                                                                                                                                                         | No                  | TD           | No      | High         |
| Hogan 2014       | Strengths and Difficulties Questionnaire                                                                                                                                    | No                  | TD           | No      | High         |
| Holmbeck 2010    | Children's Depression Inventory                                                                                                                                             | No                  | TD           | No      | High         |
| Horbach 2020     | Child Behavior Checklist                                                                                                                                                    | No                  | TD           | No      | High         |
| Hoza 2010        | Children's Depression Inventory                                                                                                                                             | No                  | TD           | No      | High         |
|                  | DSM-IV Conduct Disorder Checklist                                                                                                                                           | No                  | TD           | No      | High         |
| Hunsche 2020     | Child Behavior Checklist                                                                                                                                                    | No                  | TD           | No      | High         |
| Kates 2019       | Kiddie Schedule for Affective Disorders and Schizophrenia for School-Age Children—Present and Lifetime Version/Structured Clinical Interview for DSM-IV-TR axis I Disorders | No                  | TD           | No      | High         |
| Lahey 2016       | Diagnostic Interview Schedule for Children                                                                                                                                  | No                  | TD           | No      | High         |
|                  | Diagnostic Interview Schedule for Children/Disruptive Behavior Disorders Rating Scale—DSM-IV Version                                                                        | No                  | TD           | No      | High         |
| Li 2020          | Early Childhood Inventory—4                                                                                                                                                 | No                  | TD           | No      | High         |
|                  | Emotion Expression Questionnaire                                                                                                                                            | No                  | TD           | No      | High         |

| Study             | Scale                                                                                                          | Intended population | Designed for | Adapted | Risk of bias |
|-------------------|----------------------------------------------------------------------------------------------------------------|---------------------|--------------|---------|--------------|
| Lindsay 2007      | Strengths and Difficulties Questionnaire                                                                       | No                  | TD           | No      | High         |
| Midouhas 2013     | Strengths and Difficulties Questionnaire                                                                       | No                  | TD           | No      | High         |
| Moskowitz 2020    | Repetitive Behavior Scale—Revised                                                                              | Yes                 | ASD          | No      | Low          |
| Mrug 2012         | Children’s Depression Inventory/Beck Depression Inventory                                                      | No                  | TD           | No      | High         |
|                   | Multidimensional Anxiety Scale for Children/Beck Anxiety Inventory                                             | No                  | TD           | No      | High         |
| Murray-Close 2010 | DSM-IV Conduct Disorder Checklist                                                                              | No                  | TD           | No      | High         |
| Musser 2016       | Kiddie Schedule for Affective Disorders and Schizophrenia—Epidemiological Oppositional Defiant Disorder module | No                  | TD           | No      | High         |
|                   | DSM-based checklist                                                                                            | No                  | TD           | No      | High         |
| Peverill 2019     | Child Behavior Checklist                                                                                       | No                  | TD           | No      | High         |
|                   | Repetitive Behavior Scale—Revised                                                                              | Yes                 | ASD          | No      | Low          |
|                   | Children’s Sleep Habits Questionnaire                                                                          | No                  | TD           | No      | High         |
| Rai 2018          | Short Mood and Feelings Questionnaire                                                                          | No                  | TD           | No      | High         |
| Rosema 2015       | Personality Inventory for Children—Revised/Behavior Assessment Scale for Children/Adult Behavior Checklist     | No                  | TD           | No      | High         |

| Study             | Scale                                                                                                          | Intended population | Designed for | Adapted | Risk of bias |
|-------------------|----------------------------------------------------------------------------------------------------------------|---------------------|--------------|---------|--------------|
| Sigafoos 2000     | Aberrant Behavior Checklist                                                                                    | Yes                 | DD           | No      | Low          |
| Sipal 2010        | Child Behavior Checklist                                                                                       | No                  | TD           | No      | High         |
| St Clair 2011     | Strengths and Difficulties Questionnaire                                                                       | No                  | TD           | No      | High         |
| Steinhausen 2003  | Child Behavior Checklist                                                                                       | No                  | TD           | No      | High         |
| Stringer 2020     | Strengths and Difficulties Questionnaire                                                                       | No                  | TD           | No      | High         |
| Tan 2014          | TNO-AZL Preschool Children Quality of Life Parent Form                                                         | No                  | TD           | No      | High         |
|                   | TNO-AZL Children's Quality of Life Parent Form                                                                 | No                  | TD           | No      | High         |
|                   | TNO-AZL Children's Quality of Life Child Form                                                                  | No                  | TD           | No      | High         |
| Vaillancourt 2017 | Child Behavior Checklist                                                                                       | No                  | TD           | No      | High         |
| Van keer 2021     | Scale for Emotional Development-Revised                                                                        | Yes                 | ID           | No      | Low          |
| Vaughn 1993       | Revised Behavior Problem Checklist                                                                             | No                  | TD           | No      | High         |
| Vaughn 1994       | Revised Behavior Problem Checklist                                                                             | No                  | TD           | No      | High         |
| Wall 2019         | Infant Behavior Questionnaire—Revised/Early Childhood Behavior Questionnaire/Children's Behavior Questionnaire | No                  | TD           | No      | High         |
| Wei 2014          | Social Skills Rating Systems                                                                                   | No                  | TD           | No      | High         |

| Study                | Scale                                                             | Intended population | Designed for | Adapted | Risk of bias |
|----------------------|-------------------------------------------------------------------|---------------------|--------------|---------|--------------|
|                      | School records                                                    | No                  | TD           | No      | High         |
| Williams 2016        | Australian Temperament Scale—Short Form, Infant and Child Version | No                  | TD           | No      | High         |
|                      | Single item                                                       | No                  | TD           | No      | High         |
| Woodman 2015         | Child Behavior Checklist                                          | No                  | TD           | No      | High         |
| Woodruff-Borden 2010 | Anxiety Disorders Interview Schedule for DSM-IV: Parent Version   | No                  | TD           | No      | High         |
| Yeates 2006          | Teacher Report Form                                               | No                  | TD           | No      | High         |
| Zendarski 2021       | Strengths and Difficulties Questionnaire                          | No                  | TD           | No      | High         |

*Note.* Risk of bias in the fourth domain (i.e., use of instruments originally not intended for use in the NDD population) and the factors used as the basis for the decision: if children with NDD were the intended population and if the scale and/or procedures were somehow adapted to the needs of children with NDD. Abbreviations used in the table: autism spectrum disorder (ASD), developmental disabilities (DD), Diagnostic and Statistical Manual of Mental Disorders (DSM), Netherlands Organization for Applied Scientific Research/Academic Hospital Leiden Center (TNO-AZL), typically developing children (TD).

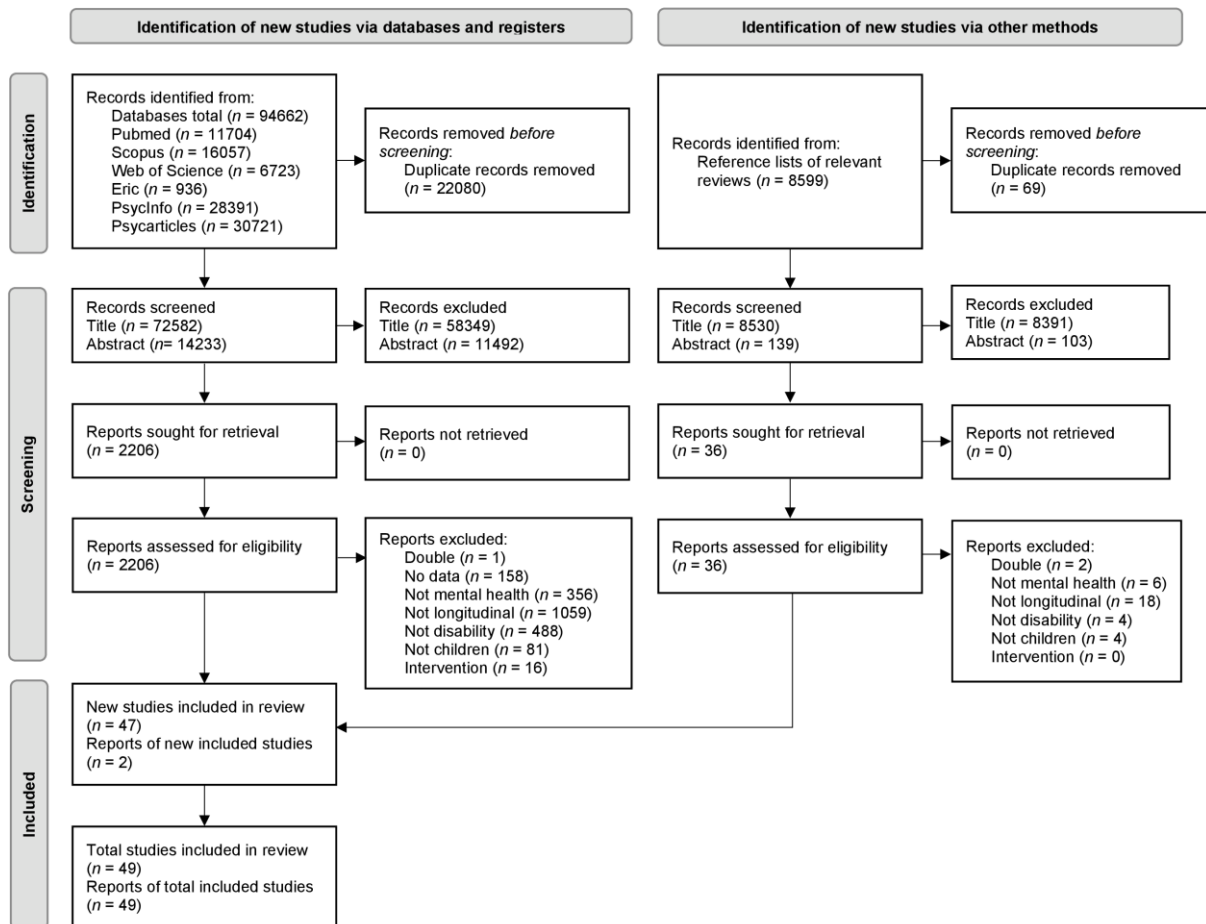

**Supplementary Fig. 1** PRISMA flow diagram depicting how records were identified, screened, and assessed for eligibility at different phases

## ISSUES

|                        | Risk of bias domains |    |    |    | Overall |
|------------------------|----------------------|----|----|----|---------|
|                        | D1                   | D2 | D3 | D4 |         |
| Alsem 2013             | +                    | +  | +  | +  | +       |
| Anderson 2011          | +                    | +  | +  | +  | +       |
| Auerbach 2008          | +                    | +  | +  | +  | +       |
| Barbeau 2021           | +                    | +  | +  | +  | +       |
| Biederman 1996         | +                    | +  | +  | +  | +       |
| Cicciolla 2014         | +                    | +  | +  | +  | +       |
| Colvert 2021           | +                    | +  | +  | +  | +       |
| Cornish 2012           | +                    | +  | +  | +  | +       |
| Fielding-Gebhardt 2020 | +                    | +  | +  | +  | +       |
| Flouri 2015            | +                    | +  | +  | +  | +       |
| Gotham 2015            | +                    | +  | +  | +  | +       |
| Green 2005             | +                    | +  | +  | +  | +       |
| Harvey 2015            | +                    | +  | +  | +  | +       |
| Hauser-Cram 2016       | +                    | +  | +  | +  | +       |
| Hickey 2020            | +                    | +  | +  | +  | +       |
| Hogan 2014             | +                    | +  | +  | +  | +       |
| Holmbeck 2010          | +                    | +  | +  | +  | +       |
| Horbach 2020           | +                    | +  | +  | +  | +       |
| Hoza 2010              | +                    | +  | +  | +  | +       |
| Hunsche 2020           | +                    | +  | +  | +  | +       |
| Kates 2019             | +                    | +  | +  | +  | +       |
| Lahey 2016             | +                    | +  | +  | +  | +       |
| Li 2020                | ?                    | +  | +  | +  | +       |
| Lindsay 2007           | +                    | +  | +  | +  | +       |
| Midouhas 2013          | +                    | +  | +  | +  | +       |
| Moskowitz 2020         | +                    | +  | +  | +  | +       |
| Mrug 2012              | +                    | +  | +  | +  | +       |
| Murray-Close 2010      | +                    | +  | +  | +  | +       |
| Musser 2016            | +                    | +  | +  | +  | +       |
| Peeverill 2019         | +                    | +  | +  | +  | +       |
| Rai 2018               | +                    | +  | +  | +  | +       |
| Rosema 2015            | +                    | +  | +  | +  | +       |
| Sigafos 2000           | +                    | +  | +  | +  | +       |
| Sipal 2010             | +                    | +  | +  | +  | +       |
| St Clair 2011          | +                    | +  | +  | +  | +       |
| Steinhausen 2003       | +                    | +  | +  | +  | +       |
| Stringer 2020          | +                    | +  | +  | +  | +       |
| Tan 2014               | +                    | +  | +  | +  | +       |
| Vaillancourt 2017      | +                    | +  | +  | +  | +       |
| Van kee 2021           | +                    | +  | +  | +  | +       |
| Vaughn 1993            | +                    | +  | +  | +  | +       |
| Vaughn 1994            | +                    | +  | +  | +  | +       |
| Wall 2019              | +                    | +  | +  | +  | +       |
| Wei 2014               | +                    | +  | +  | +  | +       |
| Williams 2016          | +                    | +  | +  | +  | +       |
| Woodman 2015           | +                    | +  | +  | +  | +       |
| Woodruff-Borden 2010   | +                    | +  | +  | +  | +       |
| Yeates 2006            | +                    | +  | +  | +  | +       |
| Zendarski 2021         | +                    | +  | +  | +  | +       |

D1: Bias due to overlap between the outcome studied and core characteristics of the study group  
 D2: Bias due to insufficient recruitment of informants (i.e., perspectives and contexts) reporting on the studied mental health problem(s)  
 D3: Bias due to the unwarranted omission of the child's perspective in the measurement(s) of mental health problem(s)  
 D4: Bias due to the use of instruments and procedures that were not designed to measure mental health problems in children with NDD

Judgement  
 High  
 Unclear  
 Low  
 No information

**Supplementary Fig. 2** Risk of bias for each of the four domains, i.e., overlap between mental health problem outcomes and characteristics of the study group (D1), insufficient informants (D2), unwarranted omission of the child perspective (D3), use of instruments not designed for or adapted to the study group (D4), as well as the overall risk of bias assessment for the included studies
